# Supplementary material for: Human Liver Stem Cells Suppress T-Cell Proliferation, NK Activity, and Dendritic Cell Differentiation
Source: PubMed Central journal article supplement (PMC4834412; doi:10.1155/2016/8468549), 2016-04-04
Supplement: 8468549.f1.pdf [file 8468549.f1.pdf]

**Supplementary Table 1. Phenotype of HLA I and II of HLSCs and of PBMCs derived from different healthy donors.**

|                    | CLASS I |        |        | CLASS II |          |          |
|--------------------|---------|--------|--------|----------|----------|----------|
|                    | HLA-A   | HLA-B  | HLA-C  | HLA-DRB1 | HLA-DQA1 | HLA-DQB1 |
| <b>HLSCs</b>       | 03, 32  | 44     | 04, 05 | 03 ,13   | 01, 05   | 02, 06   |
| <b>DONOR<br/>1</b> | 03, 26  | 13, 55 | 03, 06 | 04, 07   | 02, 03   | 02, 03   |
| <b>DONOR<br/>2</b> | 02, 68  | 07, 50 | 06, 07 | 07, 15   | 01, 02   | 02, 06   |
| <b>DONOR<br/>3</b> | 02, 03  | 18, 35 | 04, 07 | 11       | 05       | 03       |
| <b>DONOR<br/>4</b> | 02, 24  | 18, 51 | 02, 12 | 01, 11   | 01, 05   | 03, 05   |
| <b>DONOR<br/>5</b> | 02, 03  | 07, 57 | 06, 07 | 03, 07   | 02, 05   | 02       |
| <b>DONOR<br/>6</b> | 02, 33  | 14, 51 | 04, 08 | 01, 14   | 01       | 05       |

**SUPPLEMENTARY FIGURES AND LEGENDS.**

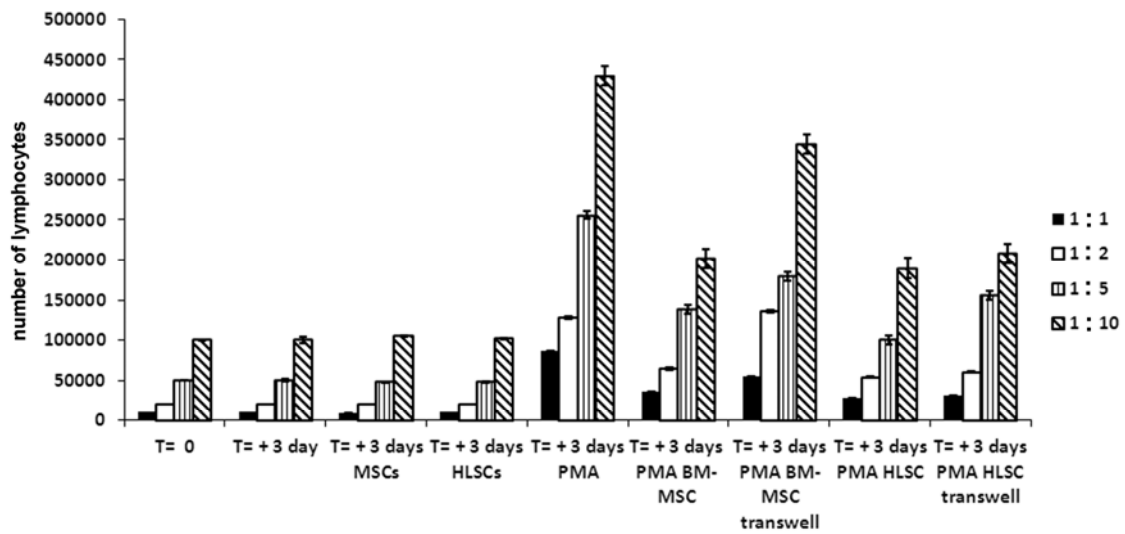

**Supplementary Figure 1**

**Supplementary Figure 1. HLSCs suppress T-lymphocyte proliferation induced by PMA.** CD3<sup>+</sup> lymphocytes were stimulated with PMA, in the presence or absence of MSCs or HLSCs at different ratio (lymphocytes: HLSCs/MSCs 1:1, 2:1, 5:1, 10:1) in direct contact or in the presence of transwells. The proliferation rate was evaluated after 3 days of co-culture. Results are expressed as mean  $\pm$ SE of absolute number of T cells in one representative experiment conducted in duplicate. Six experiments with similar results have been conducted.

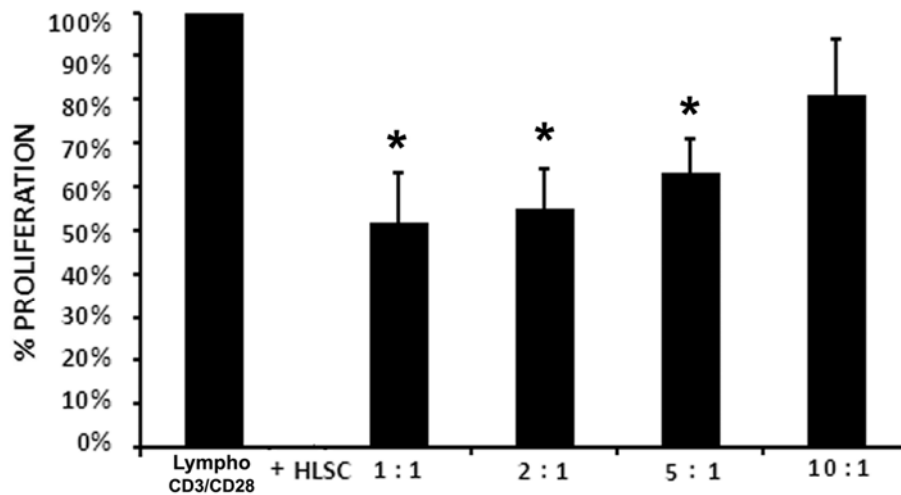

**Supplementary Figure 2**

**Supplementary Figure 2 . HLSCs suppress T-lymphocyte proliferation induced by CD3/CD28 antibodies.** CD3<sup>+</sup> lymphocytes were stimulated with anti-CD3/CD28 antibodies, in the presence or absence of HLSCs at different ratio (lymphocytes: HLSCs 1:1, 2:1, 5:1, 10:1) in the presence of transwells. The proliferation of T cells was evaluated after 3 days of co-culture. Results are expressed as mean  $\pm$ SD of 3 different experiments conducted in duplicate. 100% of proliferation correspond to lymphocytes stimulated with CD3/CD28 antibodies. Data were analysed by ANOVA with Bonferroni correction; \*  $p < 0.05$  lymphocytes stimulated with CD3/CD28 co-cultured with HLSCs at different ratio vs lymphocytes stimulated with CD3/CD28 alone.

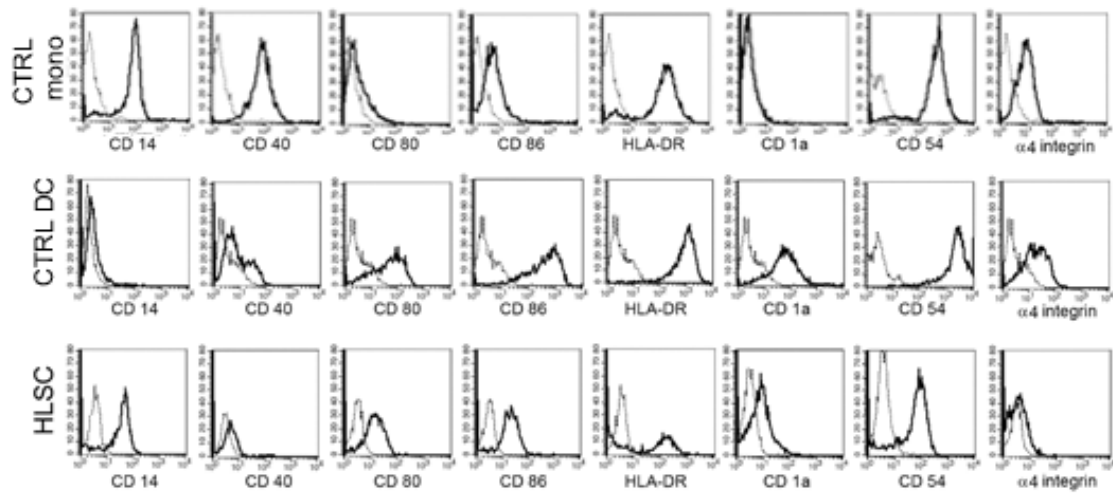

**Supplementary Figure 3**

**Supplementary Figure 3. HLSCs suppress monocyte-derived DC differentiation.**

Representative cytofluorimetric analysis of monocyte (CTRL mono) and monocyte-derived DCs differentiated in presence or absence (CTRL DC) of HLSCs showing the expression of the following surface markers: CD14, CD40, CD80, CD86, HLA-DR, CD1a, CD54 and  $\alpha$ 4 integrin.
